# Supplementary material for: Synthesis, Molecular Modeling Study, and Quantum-Chemical-Based Investigations of Isoindoline-1,3-diones as Antimycobacterial Agents
Source: PubMed Central journal article supplement — ACS Omega. 2022 Jun 10;7(25):21820–44. doi: 10.1021/acsomega.2c01981 (PMC9244950; doi:10.1021/acsomega.2c01981), 2022-06-10
Supplement: ao2c01981_si_001.pdf [file ao2c01981_si_001.pdf]

**Supplementary Information**  
**Synthesis, Molecular Modelling Study and  
Quantum Chemical Based Investigations of  
Isoindoline-1,3-diones as Anti-mycobacterial  
Agents**

Iqrar Ahmad <sup>a</sup>, Rahul H. Pawara <sup>a</sup>, Rukaiyya T. Girase <sup>a</sup>, Asama Y. Pathan <sup>a</sup>, Vilas R. Jagatap <sup>a</sup>, Nisheeth  
C. Desai <sup>b</sup>, Yusuf Oloruntoyin Ayipo <sup>c</sup>, Sanjay J. Surana <sup>a</sup>, Harun M. Patel <sup>a</sup> \*

---

<sup>a</sup> *Division of Computer-Aided Drug Design, Dept. of Pharmaceutical Chemistry, R. C. Patel Institute of Pharmaceutical  
Education and Research, Shirpur, District Dhule-425 405, Maharashtra, India*

<sup>b</sup> *Division of Medicinal Chemistry Department of Chemistry, (DST-FIST Sponsored) Mahatma Gandhi Campus, Maharaja  
Krishnakumarsinhji Bhavnagar University, Bhavnagar, India*

<sup>c</sup> *Centre for Drug Research, Universiti Sains Malaysia, USM, Pulau Pinang, Malaysia*

---

---

**Corresponding Author\*** E-mail addresses: [hpatel\\_38@yahoo.com](mailto:hpatel_38@yahoo.com)

## LCMS of Compound 2

---

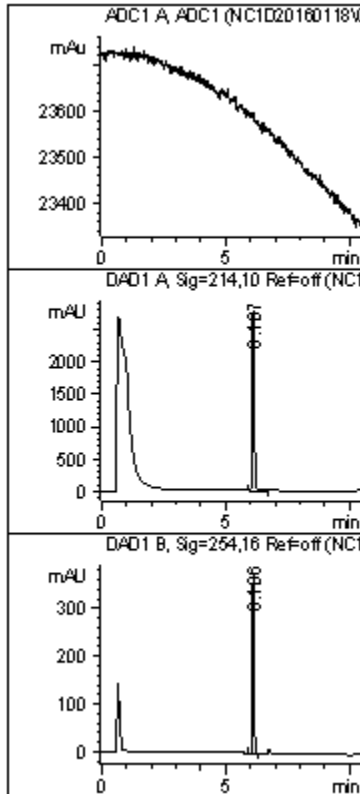

Signal 1: ADC1 A, ADC1

Signal 2: DAD1 A, Sig=214,10 Ref=off

| Peak # | RetTime [min] | Type | Width [min] | Area [mAU*s] | Height [mAU] | Area %   |
|--------|---------------|------|-------------|--------------|--------------|----------|
| 1      | 6.107         | VV   | 0.0948      | 1.65349e4    | 2803.53711   | 100.0000 |

Totals :                                   1.65349e4  2803.53711

Signal 3: DAD1 B, Sig=254,16 Ref=off

| Peak # | RetTime [min] | Type | Width [min] | Area [mAU*s] | Height [mAU] | Area %   |
|--------|---------------|------|-------------|--------------|--------------|----------|
| 1      | 6.106         | VB   | 0.0631      | 1585.15942   | 376.94125    | 100.0000 |

Totals :                                   1585.15942  376.94125

Signal 4: MSD2 TIC, MS File

| Peak # | RetTime [min] | Type | Width [min] | Area      | Height    | Area %   |
|--------|---------------|------|-------------|-----------|-----------|----------|
| 1      | 6.174         | BV   | 0.2440      | 1.97362e6 | 1.09253e5 | 100.0000 |

Totals :                                   1.97362e6  1.09253e5

=====  
\*\*\* End of Report \*\*\*

| Retention Time (MS) | MS Area | Mol. Weight or Ion |
|---------------------|---------|--------------------|
| 6.174               | 1973623 | 241.00 I           |

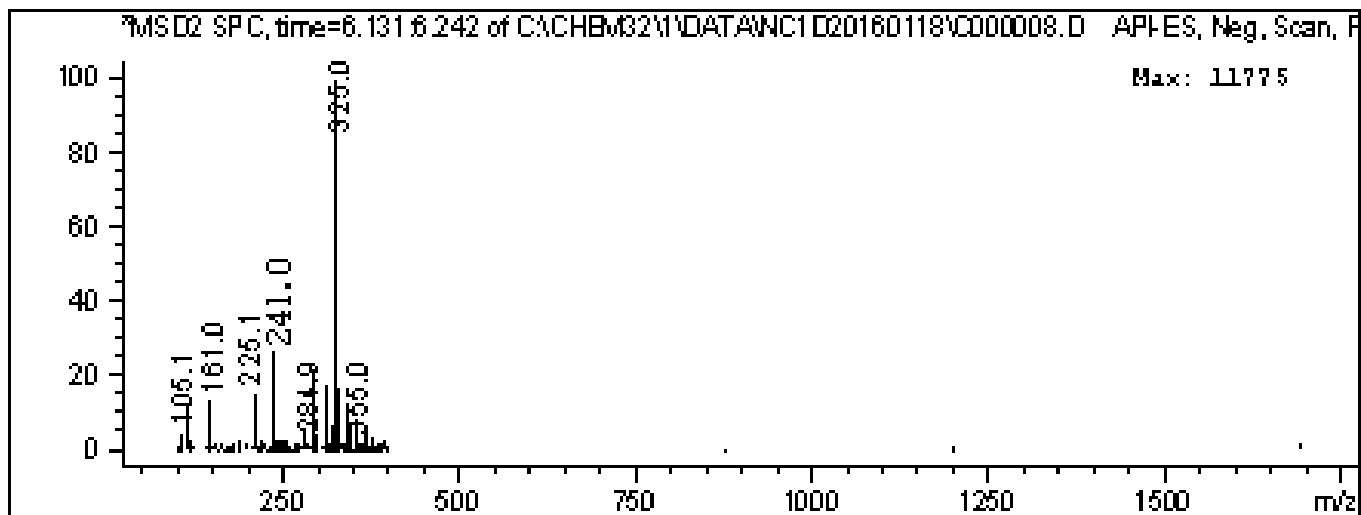

\*\*\* End of Report \*\*\*

# LCMS of Compound 3

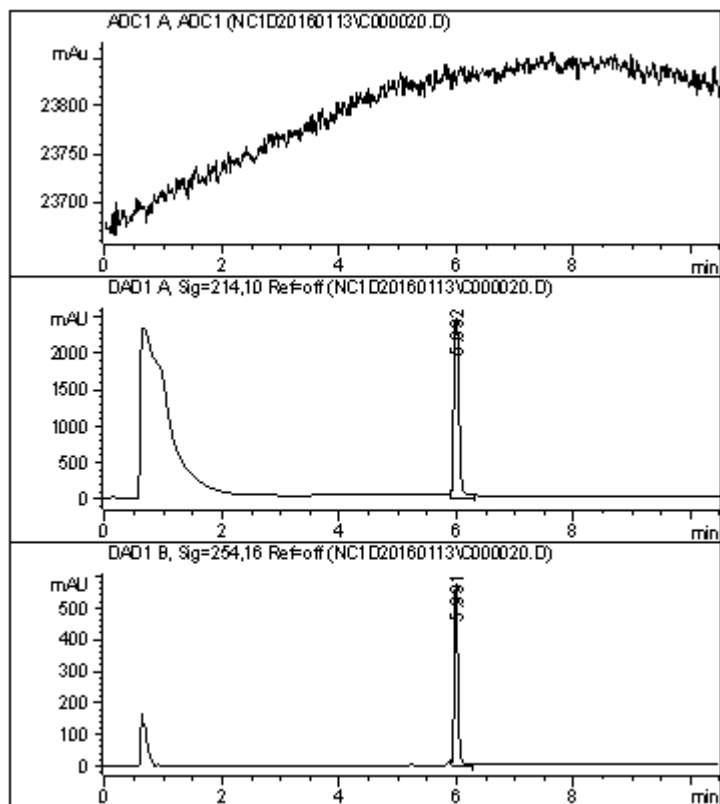

=====  
 Area Percent Report  
 =====

Sorted By : Signal  
 Multiplier : 1.0000  
 Dilution : 1.0000  
 Use Multiplier & Dilution Factor with ISTDs

Signal 1: ADC1 A, ADC1

Signal 2: DAD1 A, Sig=214,10 Ref=off

| Peak #   | RetTime [min] | Type | Width [min] | Area [mAU*s] | Height [mAU] | Area %   |
|----------|---------------|------|-------------|--------------|--------------|----------|
| 1        | 5.992         | VV   | 0.1003      | 1.58720e4    | 2493.75610   | 100.0000 |
| Totals : |               |      |             | 1.58720e4    | 2493.75610   |          |

Signal 3: DAD1 B, Sig=254,16 Ref=off

| Peak #   | RetTime [min] | Type | Width [min] | Area [mAU*s] | Height [mAU] | Area %   |
|----------|---------------|------|-------------|--------------|--------------|----------|
| 1        | 5.991         | VB   | 0.0652      | 2436.36963   | 578.12140    | 100.0000 |
| Totals : |               |      |             | 2436.36963   | 578.12140    |          |

Signal 4: MSD2 TIC, MS File

| Peak #   | RetTime [min] | Type | Width [min] | Area      | Height    | Area %   |
|----------|---------------|------|-------------|-----------|-----------|----------|
| 1        | 6.050         | VV   | 0.4081      | 1.85501e7 | 5.77425e5 | 100.0000 |
| Totals : |               |      |             | 1.85501e7 | 5.77425e5 |          |

=====  
 \*\*\* End of Report \*\*\*

| Retention Time (MS) | MS Area  | Mol. Weight or Ion |
|---------------------|----------|--------------------|
| 6.050               | 18550132 | 237.9 I            |

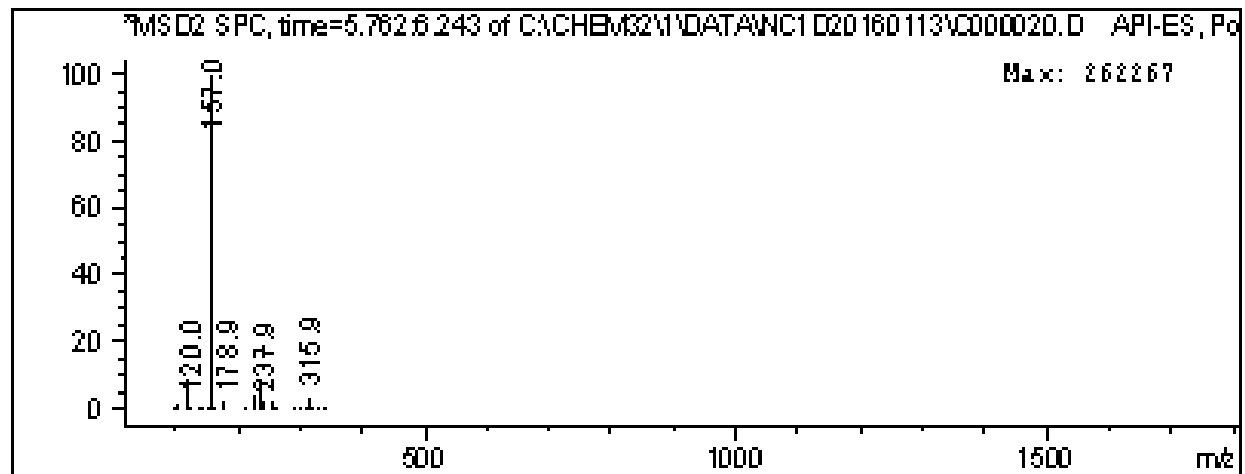

\*\*\* End of Report \*\*\*

# LCMS of Compound 4

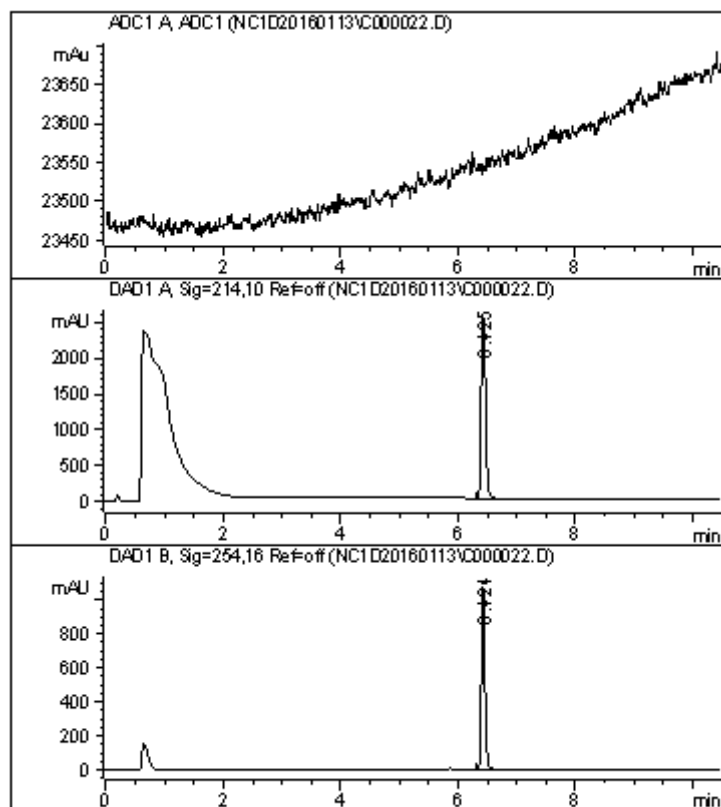

=====  
 Area Percent Report  
 =====

Sorted By : Signal  
 Multiplier : 1.0000  
 Dilution : 1.0000  
 Use Multiplier & Dilution Factor with ISTDs

Signal 1: ADC1 A, ADC1

Signal 2: DAD1 A, Sig=214,10 Ref=off

| Peak #   | RetTime [min] | Type | Width [min] | Area [mAU*s] | Height [mAU] | Area %   |
|----------|---------------|------|-------------|--------------|--------------|----------|
| 1        | 6.425         | VV   | 0.0868      | 1.34865e4    | 2505.05908   | 100.0000 |
| Totals : |               |      |             | 1.34865e4    | 2505.05908   |          |

Signal 3: DAD1 B, Sig=254,16 Ref=off

| Peak #   | RetTime [min] | Type | Width [min] | Area [mAU*s] | Height [mAU] | Area %   |
|----------|---------------|------|-------------|--------------|--------------|----------|
| 1        | 6.424         | BV   | 0.0644      | 4491.55518   | 1083.52832   | 100.0000 |
| Totals : |               |      |             | 4491.55518   | 1083.52832   |          |

Signal 4: MSD2 TIC, MS File

| Peak #   | RetTime [min] | Type | Width [min] | Area      | Height    | Area %   |
|----------|---------------|------|-------------|-----------|-----------|----------|
| 1        | 6.500         | VV   | 0.2533      | 6.90508e6 | 3.66076e5 | 100.0000 |
| Totals : |               |      |             | 6.90508e6 | 3.66076e5 |          |

=====  
 \*\*\* End of Report \*\*\*

| Retention Time (MS) | MS Area | Mol. Weight or Ion |
|---------------------|---------|--------------------|
| 6.500               | 6905077 | 275.1              |

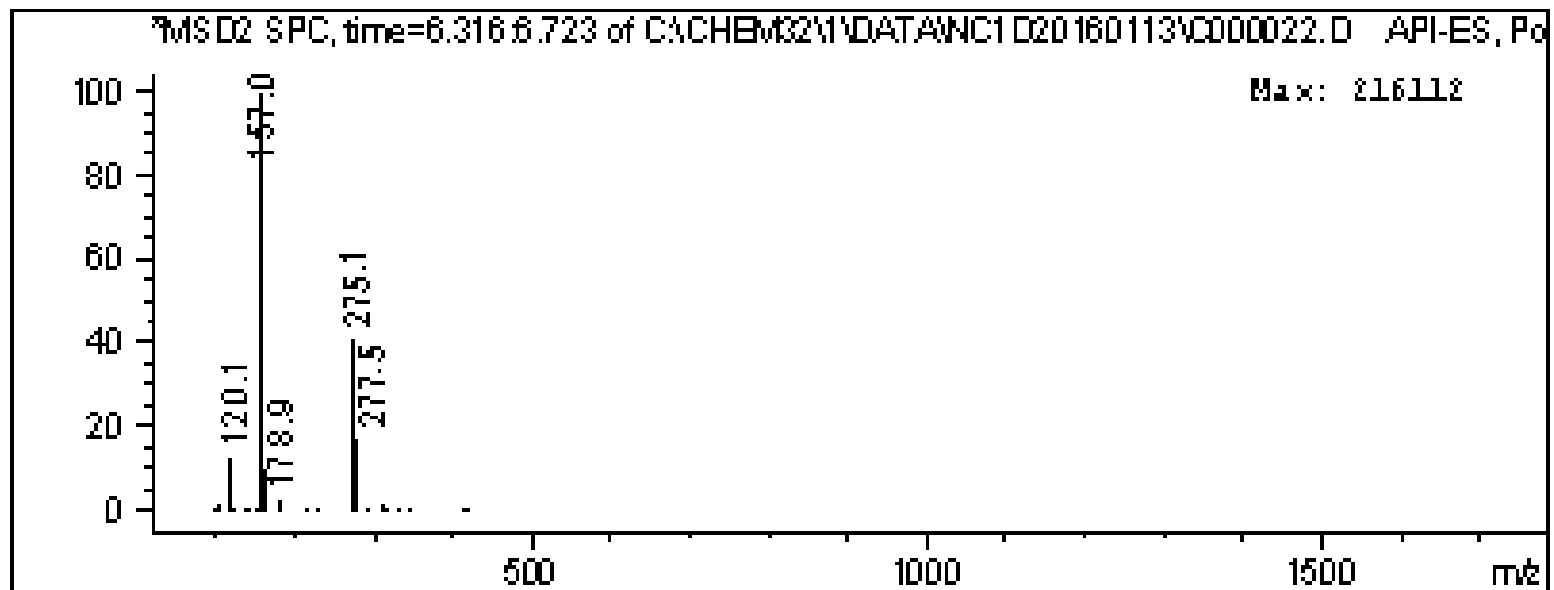

\*\*\* End of Report \*\*\*

# LCMS of Compound 5

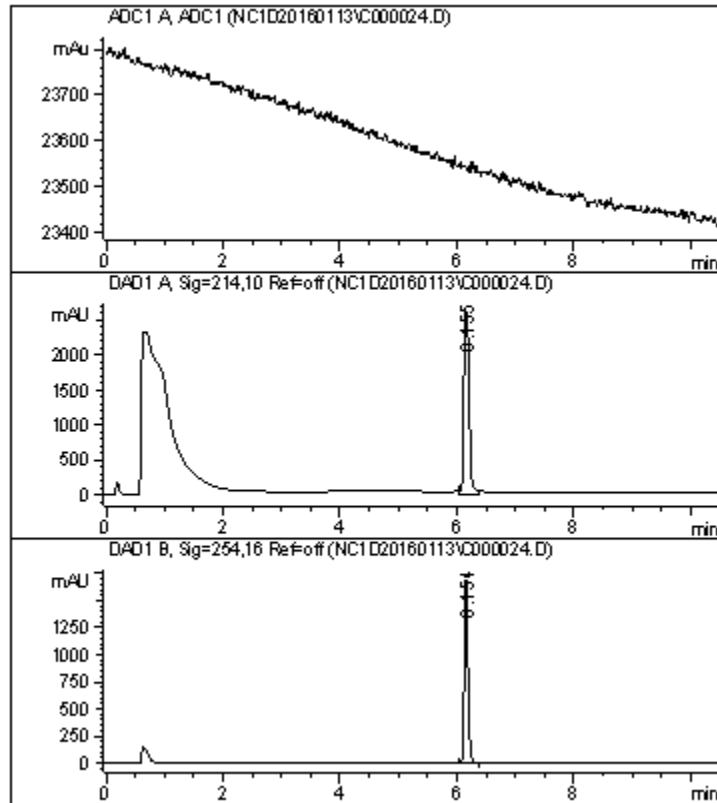

=====  
 Area Percent Report  
 =====

Sorted By : Signal  
 Multiplier : 1.0000  
 Dilution : 1.0000  
 Use Multiplier & Dilution Factor with ISTDs

Signal 1: ADC1 A, ADC1

Signal 2: DAD1 A, Sig=214,10 Ref=off

| Peak #   | RetTime [min] | Type | Width [min] | Area [mAU*s] | Height [mAU] | Area %   |
|----------|---------------|------|-------------|--------------|--------------|----------|
| 1        | 6.155         | VV   | 0.1031      | 1.67024e4    | 2596.01855   | 100.0000 |
| Totals : |               |      |             | 1.67024e4    | 2596.01855   |          |

Signal 3: DAD1 B, Sig=254,16 Ref=off

| Peak #   | RetTime [min] | Type | Width [min] | Area [mAU*s] | Height [mAU] | Area %   |
|----------|---------------|------|-------------|--------------|--------------|----------|
| 1        | 6.154         | VV   | 0.0659      | 7280.68262   | 1701.35840   | 100.0000 |
| Totals : |               |      |             | 7280.68262   | 1701.35840   |          |

Signal 4: MSD2 TIC, MS File

| Peak #   | RetTime [min] | Type | Width [min] | Area      | Height    | Area %   |
|----------|---------------|------|-------------|-----------|-----------|----------|
| 1        | 6.218         | VV   | 0.2806      | 1.23543e7 | 5.82721e5 | 100.0000 |
| Totals : |               |      |             | 1.23543e7 | 5.82721e5 |          |

=====  
 \*\*\* End of Report \*\*\*  
 =====



| Retention Time (MS) | MS Area  | Mol. Weight or Ion |
|---------------------|----------|--------------------|
| 6.218               | 12354342 | 237.8 I            |

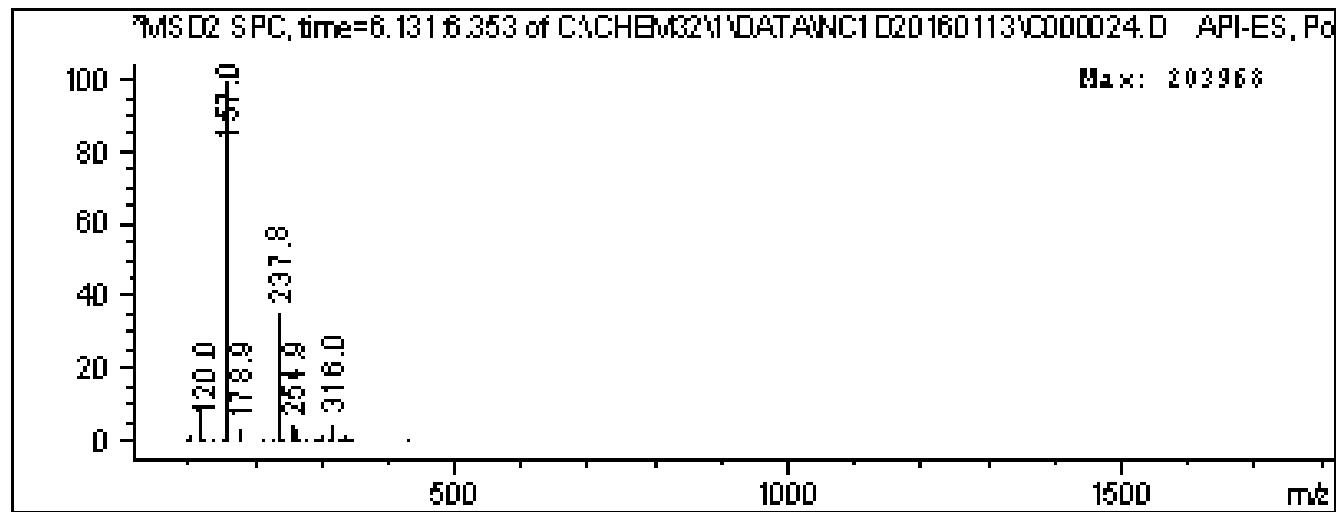

\*\*\* End of Report \*\*\*

# LCMS of Compound 6

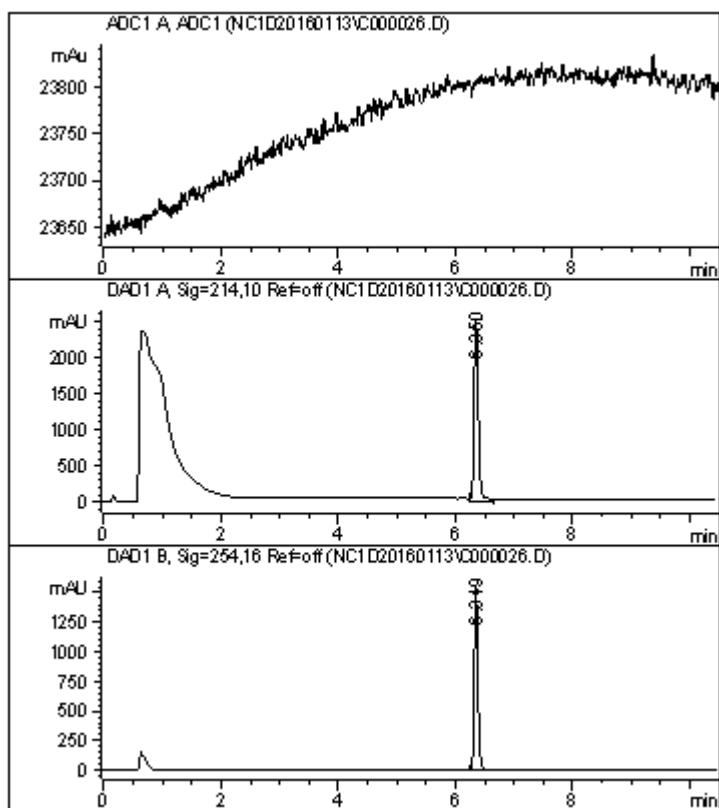

## Area Percent Report

```

=====
Sorted By      :      Signal
Multiplier    :      1.0000
Dilution      :      1.0000
Use Multiplier & Dilution Factor with ISTDs
    
```

Signal 1: ADC1 A, ADC1

Signal 2: DAD1 A, Sig=214,10 Ref=off

| Peak #   | RetTime [min] | Type | Width [min] | Area [mAU*s] | Height [mAU] | Area %   |
|----------|---------------|------|-------------|--------------|--------------|----------|
| 1        | 6.350         | VV   | 0.0826      | 1.30179e4    | 2507.36230   | 100.0000 |
| Totals : |               |      |             | 1.30179e4    | 2507.36230   |          |

Signal 3: DAD1 B, Sig=254,16 Ref=off

| Peak #   | RetTime [min] | Type | Width [min] | Area [mAU*s] | Height [mAU] | Area %   |
|----------|---------------|------|-------------|--------------|--------------|----------|
| 1        | 6.349         | VV   | 0.0652      | 6547.25830   | 1553.14368   | 100.0000 |
| Totals : |               |      |             | 6547.25830   | 1553.14368   |          |

Signal 4: MSD2 TIC, MS File

| Peak #   | RetTime [min] | Type | Width [min] | Area      | Height    | Area %   |
|----------|---------------|------|-------------|-----------|-----------|----------|
| 1        | 6.421         | VV   | 0.2740      | 8.12757e6 | 3.93910e5 | 100.0000 |
| Totals : |               |      |             | 8.12757e6 | 3.93910e5 |          |

\*\*\* End of Report \*\*\*

| Retention Time (MS) | MS Area | Mol. Weight or Ion |
|---------------------|---------|--------------------|
| 6.421               | 8127571 | 257.8              |

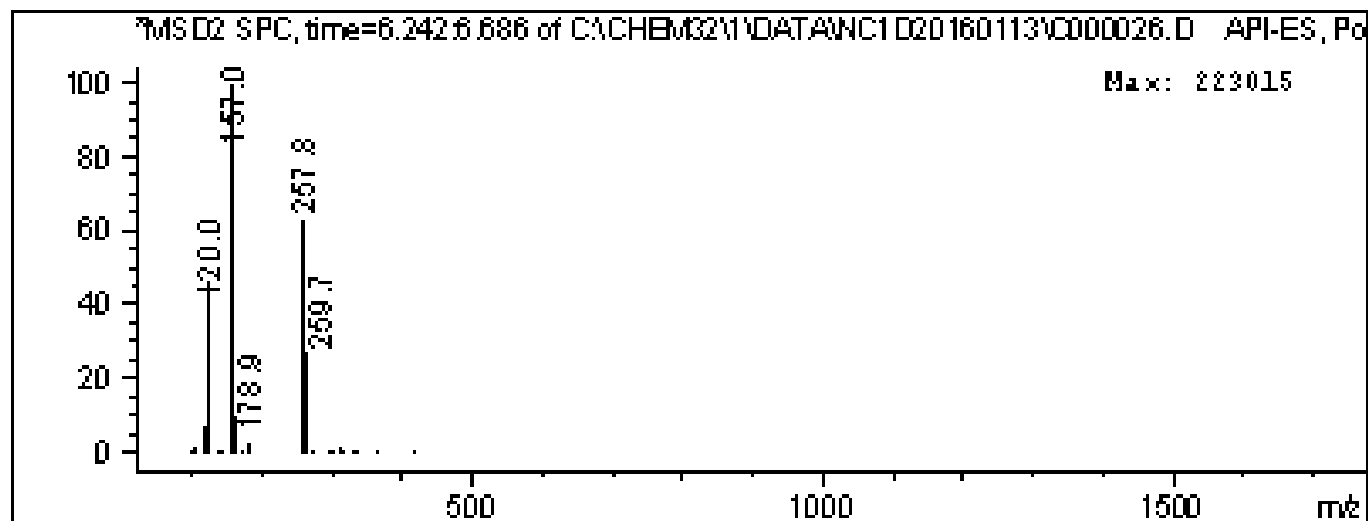

\*\*\* End of Report \*\*\*

# LCMS of Compound 7

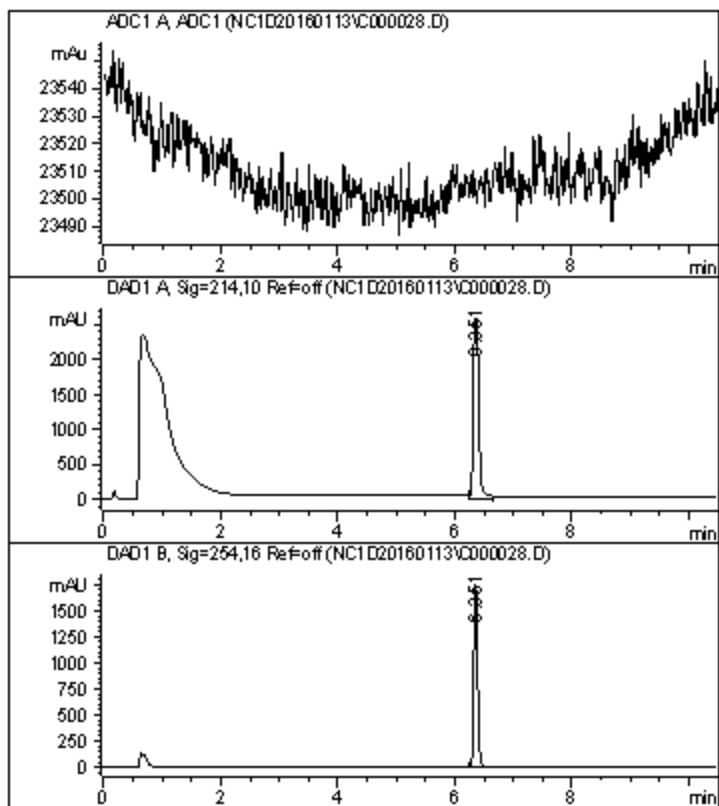

=====  
 Area Percent Report  
 =====

Sorted By : Signal  
 Multiplier : 1.0000  
 Dilution : 1.0000  
 Use Multiplier & Dilution Factor with ISTDs

Signal 1: ADC1 A, ADC1

Signal 2: DAD1 A, Sig=214,10 Ref=off

| Peak # | RetTime [min] | Type | Width [min] | Area [mAU*s] | Height [mAU] | Area %   |
|--------|---------------|------|-------------|--------------|--------------|----------|
| 1      | 6.351         | VV   | 0.1061      | 1.73579e4    | 2591.47925   | 100.0000 |

Totals : 1.73579e4 2591.47925

Signal 3: DAD1 B, Sig=254,16 Ref=off

| Peak # | RetTime [min] | Type | Width [min] | Area [mAU*s] | Height [mAU] | Area %   |
|--------|---------------|------|-------------|--------------|--------------|----------|
| 1      | 6.351         | VV   | 0.0675      | 7801.28760   | 1768.18237   | 100.0000 |

Totals : 7801.28760 1768.18237

Signal 4: MSD2 TIC, MS File

| Peak # | RetTime [min] | Type | Width [min] | Area      | Height    | Area %   |
|--------|---------------|------|-------------|-----------|-----------|----------|
| 1      | 6.419         | VV   | 0.2881      | 8.79154e6 | 4.20797e5 | 100.0000 |

Totals : 8.79154e6 4.20797e5

=====  
 \*\*\* End of Report \*\*\*

| Retention Time (MS) | MS Area | Mol. Weight or Ion |
|---------------------|---------|--------------------|
| 6.419               | 8791537 | 257.9              |

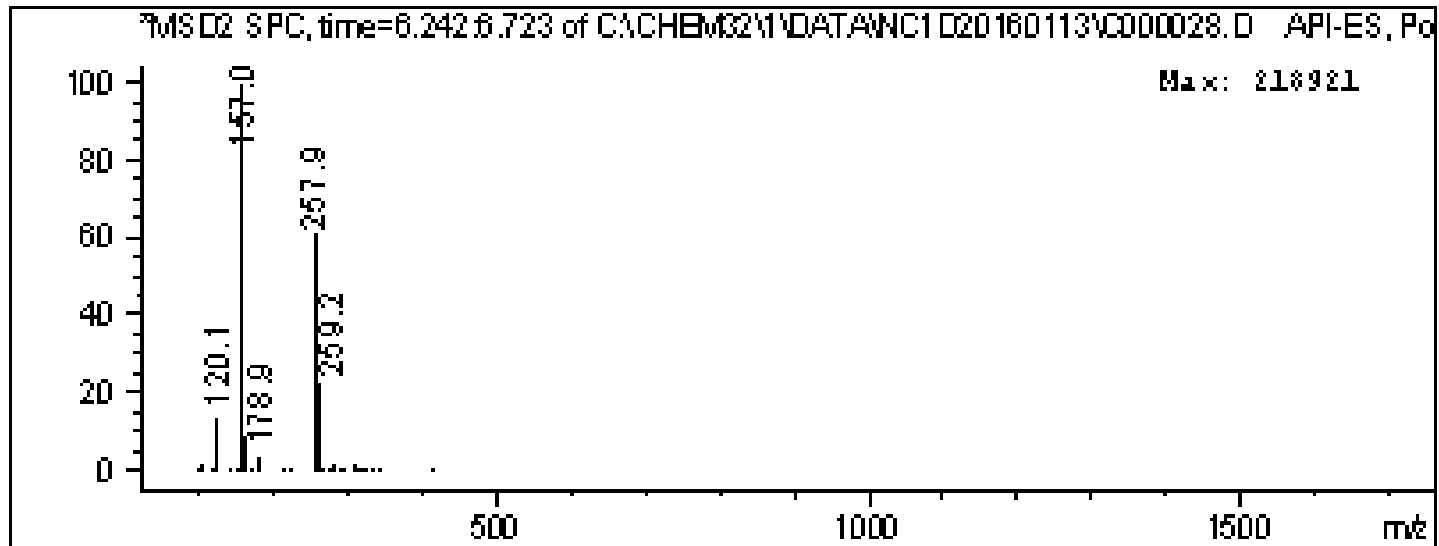

\*\*\* End of Report \*\*\*

# LCMS of Compound 8

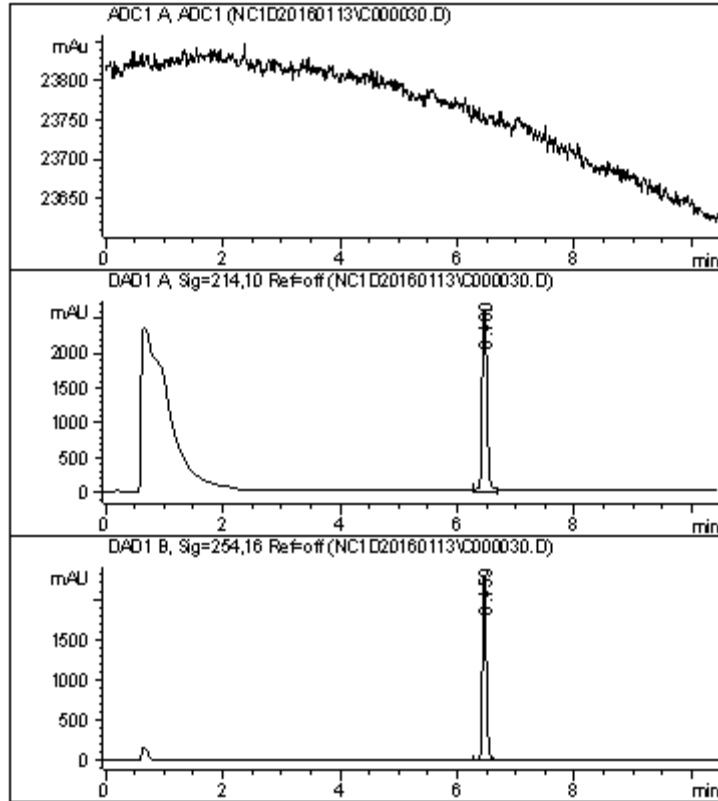

=====  
 Area Percent Report  
 =====

Sorted By : Signal  
 Multiplier : 1.0000  
 Dilution : 1.0000  
 Use Multiplier & Dilution Factor with ISTDs

Signal 1: ADC1 A, ADC1

Signal 2: DAD1 A, Sig=214,10 Ref=off

| Peak #   | RetTime [min] | Type | Width [min] | Area [mAU*s] | Height [mAU] | Area %   |
|----------|---------------|------|-------------|--------------|--------------|----------|
| 1        | 6.460         | VV   | 0.0951      | 1.54873e4    | 2612.95581   | 100.0000 |
| Totals : |               |      |             | 1.54873e4    | 2612.95581   |          |

Signal 3: DAD1 B, Sig=254,16 Ref=off

| Peak #   | RetTime [min] | Type | Width [min] | Area [mAU*s] | Height [mAU] | Area %   |
|----------|---------------|------|-------------|--------------|--------------|----------|
| 1        | 6.459         | BV   | 0.0731      | 1.03985e4    | 2283.74463   | 100.0000 |
| Totals : |               |      |             | 1.03985e4    | 2283.74463   |          |

Signal 4: MSD2 TIC, MS File

| Peak #   | RetTime [min] | Type | Width [min] | Area      | Height    | Area %   |
|----------|---------------|------|-------------|-----------|-----------|----------|
| 1        | 6.525         | VV   | 0.2676      | 8.04251e6 | 4.20272e5 | 100.0000 |
| Totals : |               |      |             | 8.04251e6 | 4.20272e5 |          |

=====  
 \*\*\* End of Report \*\*\*

| Retention Time (MS) | MS Area | Mol. Weight or Ion |
|---------------------|---------|--------------------|
| 6.525               | 8042512 | 302.4 I            |

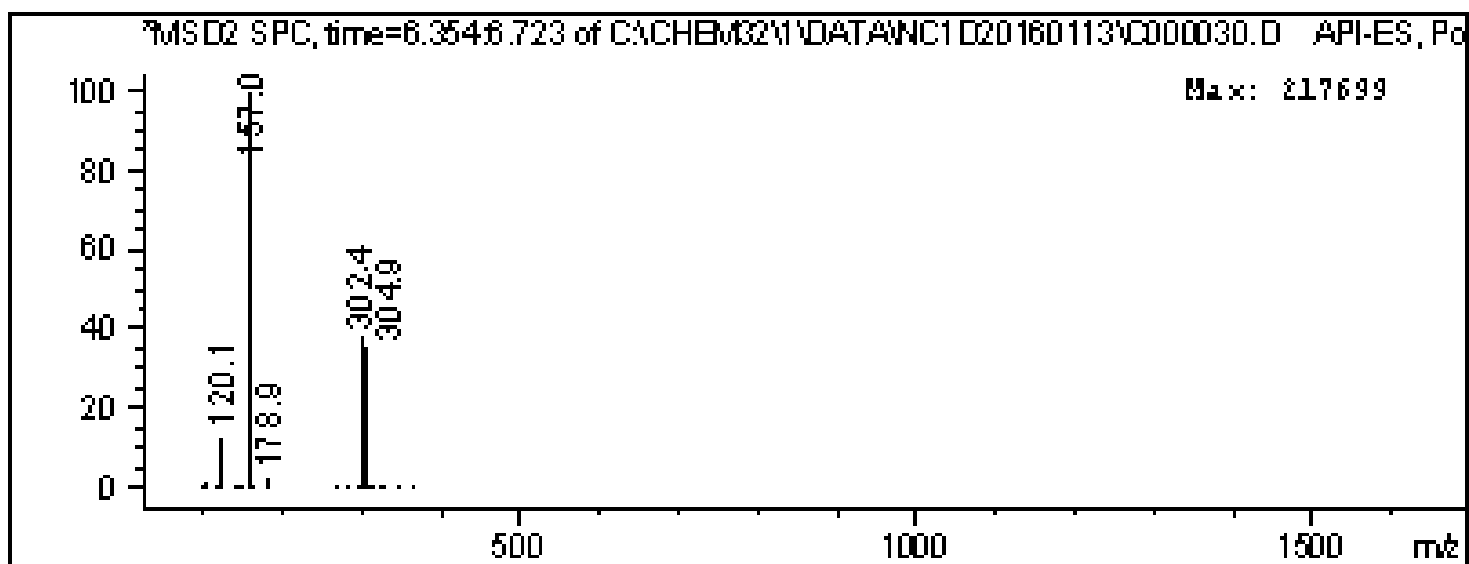

\*\*\* End of Report \*\*\*

## LCMS of Compound 9

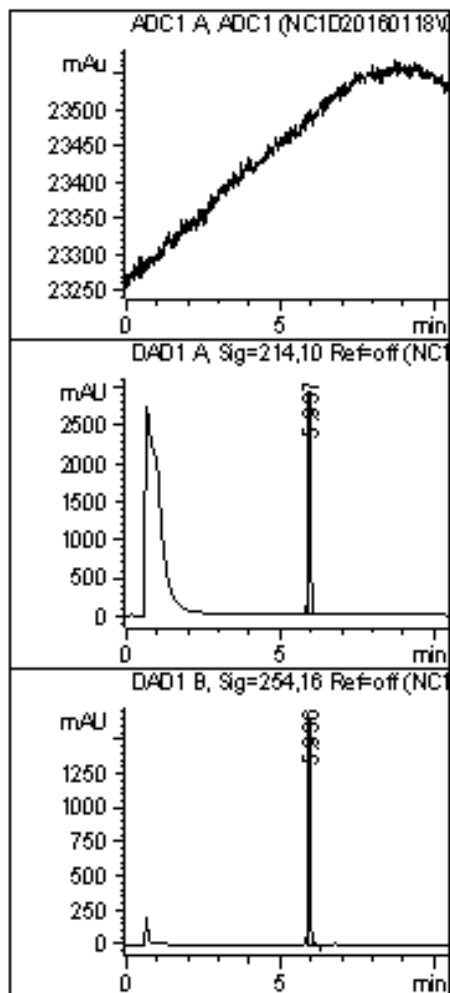

=====  
Signal 1: ADC1 A, ADC1

Signal 2: DAD1 A, Sig=214,10 Ref=off

| Peak # | RetTime [min] | Type | Width [min] | Area [mAU*s] | Height [mAU] | Area %   |
|--------|---------------|------|-------------|--------------|--------------|----------|
| 1      | 5.937         | VV   | 0.0948      | 1.74424e4    | 2956.19556   | 100.0000 |

Totals :                                   1.74424e4 2956.19556

Signal 3: DAD1 B, Sig=254,16 Ref=off

| Peak # | RetTime [min] | Type | Width [min] | Area [mAU*s] | Height [mAU] | Area %   |
|--------|---------------|------|-------------|--------------|--------------|----------|
| 1      | 5.936         | VB   | 0.0660      | 7113.25879   | 1659.08154   | 100.0000 |

Totals :                                   7113.25879 1659.08154

Signal 4: MSD2 TIC, MS File

| Peak # | RetTime [min] | Type | Width [min] | Area      | Height    | Area %   |
|--------|---------------|------|-------------|-----------|-----------|----------|
| 1      | 6.013         | VV   | 0.2600      | 2.25189e6 | 1.21848e5 | 100.0000 |

Totals :                                   2.25189e6 1.21848e5

=====  
\*\*\* End of Report \*\*\*



| Retention Time (MS) | MS Area | Mol. Weight or Ion |
|---------------------|---------|--------------------|
| 6.013               | 2251889 | 302.9              |

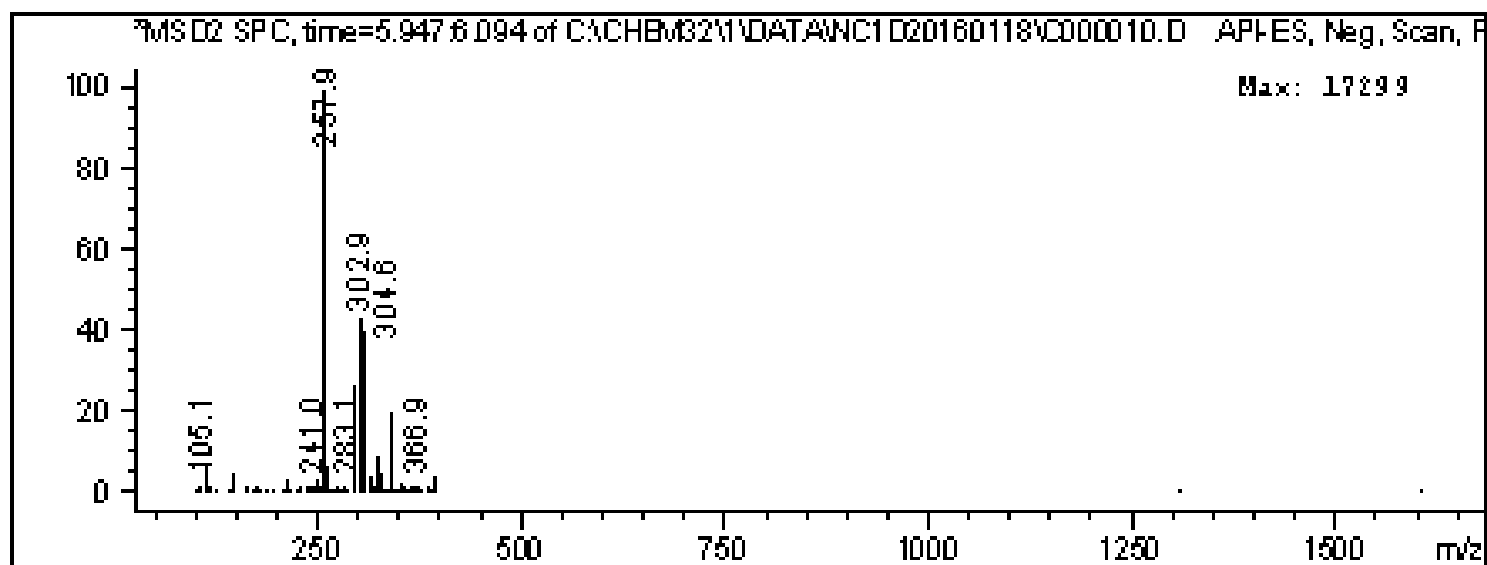

\*\*\* End of Report \*\*\*

# LCMS of Compound 10

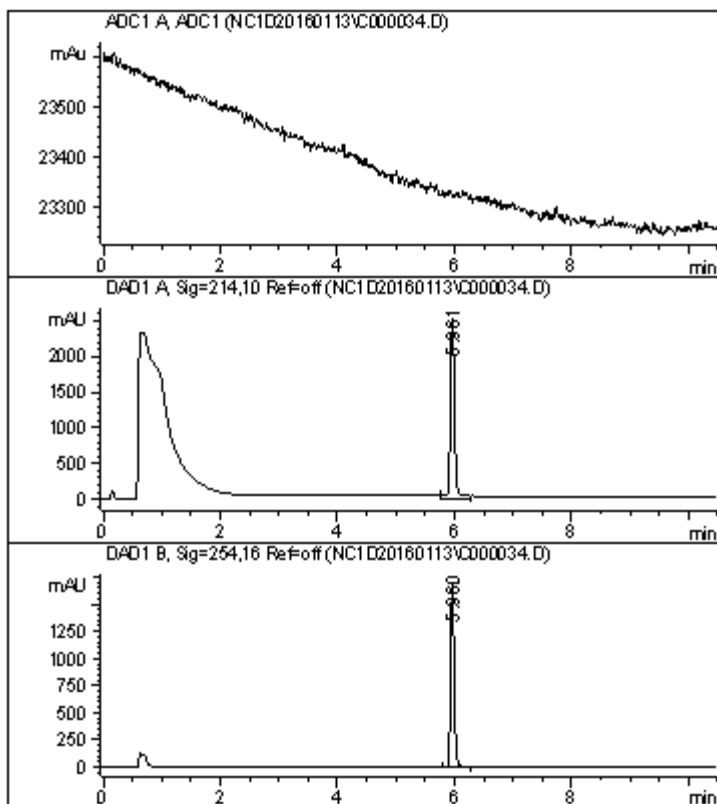

=====  
 Area Percent Report  
 =====

Sorted By : Signal  
 Multiplier : 1.0000  
 Dilution : 1.0000  
 Use Multiplier & Dilution Factor with ISTDs

Signal 1: ADC1 A, ADC1

Signal 2: DAD1 A, Sig=214,10 Ref=off

| Peak # | RetTime [min] | Type | Width [min] | Area [mAU*s] | Height [mAU] | Area %   |
|--------|---------------|------|-------------|--------------|--------------|----------|
| 1      | 5.961         | VV   | 0.0792      | 1.28939e4    | 2540.30762   | 100.0000 |

Totals : 1.28939e4 2540.30762

Signal 3: DAD1 B, Sig=254,16 Ref=off

| Peak # | RetTime [min] | Type | Width [min] | Area [mAU*s] | Height [mAU] | Area %   |
|--------|---------------|------|-------------|--------------|--------------|----------|
| 1      | 5.960         | BV   | 0.0652      | 7118.76807   | 1689.70288   | 100.0000 |

Totals : 7118.76807 1689.70288

Signal 4: MSD2 TIC, MS File

| Peak # | RetTime [min] | Type | Width [min] | Area      | Height    | Area %   |
|--------|---------------|------|-------------|-----------|-----------|----------|
| 1      | 6.034         | VV   | 0.4727      | 1.55015e7 | 4.22216e5 | 100.0000 |

Totals : 1.55015e7 4.22216e5

=====  
 \*\*\* End of Report \*\*\*

| Retention Time (MS) | MS Area  | Mol. Weight or Ion |
|---------------------|----------|--------------------|
| 6.034               | 15501548 | 268.1              |

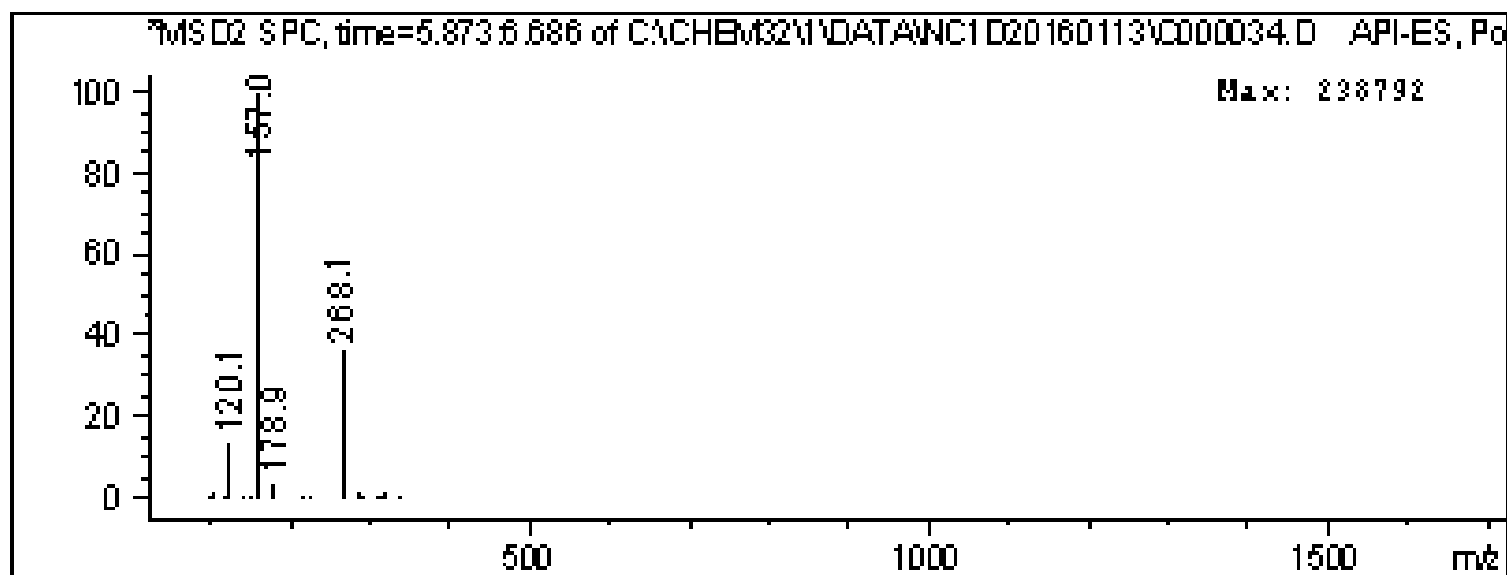

\*\*\* End of Report \*\*\*

# LCMS of Compound 11

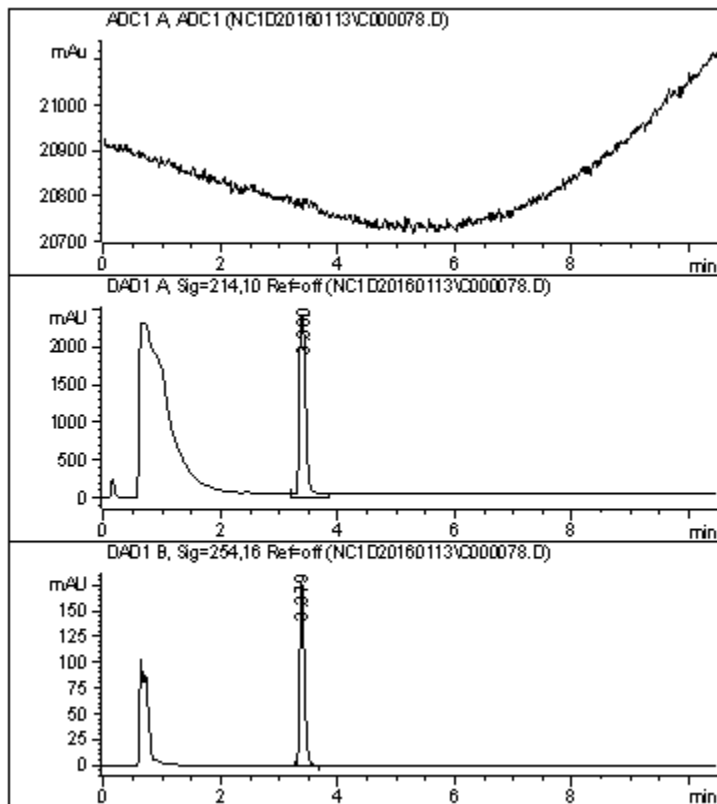

=====  
 Area Percent Report  
 =====

Sorted By : Signal  
 Multiplier : 1.0000  
 Dilution : 1.0000  
 Use Multiplier & Dilution Factor with ISTDs

Signal 1: ADC1 A, ADC1

Signal 2: DAD1 A, Sig=214,10 Ref=off

| Peak # | RetTime [min] | Type | Width [min] | Area [mAU*s] | Height [mAU] | Area %   |
|--------|---------------|------|-------------|--------------|--------------|----------|
| 1      | 3.380         | VV   | 0.1291      | 1.95934e4    | 2404.72925   | 100.0000 |

Totals : 1.95934e4 2404.72925

Signal 3: DAD1 B, Sig=254,16 Ref=off

| Peak # | RetTime [min] | Type | Width [min] | Area [mAU*s] | Height [mAU] | Area %   |
|--------|---------------|------|-------------|--------------|--------------|----------|
| 1      | 3.379         | BB   | 0.0843      | 985.55957    | 178.78323    | 100.0000 |

Totals : 985.55957 178.78323

Signal 4: MSD2 TIC, MS File

| Peak # | RetTime [min] | Type | Width [min] | Area      | Height    | Area %   |
|--------|---------------|------|-------------|-----------|-----------|----------|
| 1      | 3.452         | VV   | 0.3159      | 1.35053e7 | 5.80174e5 | 100.0000 |

Totals : 1.35053e7 5.80174e5

=====  
 \*\*\* End of Report \*\*\*

| Retention Time (MS) | MS Area  | Mol. Weight or Ion |
|---------------------|----------|--------------------|
| 3.452               | 13505338 | 205.1              |

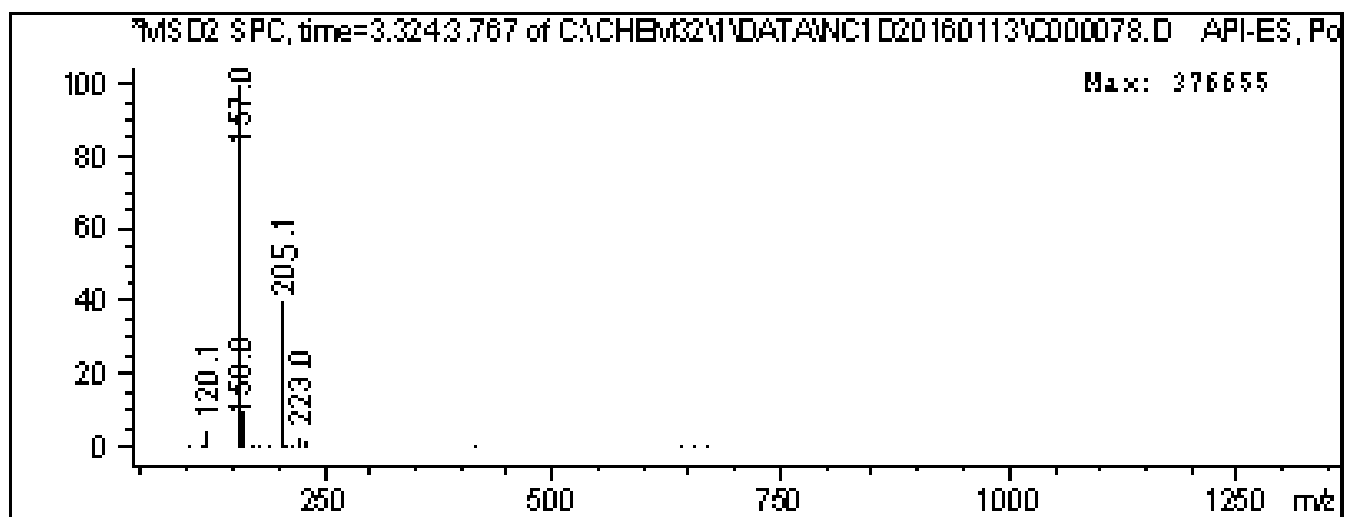

\*\*\* End of Report \*\*\*

# LCMS of Compound 14

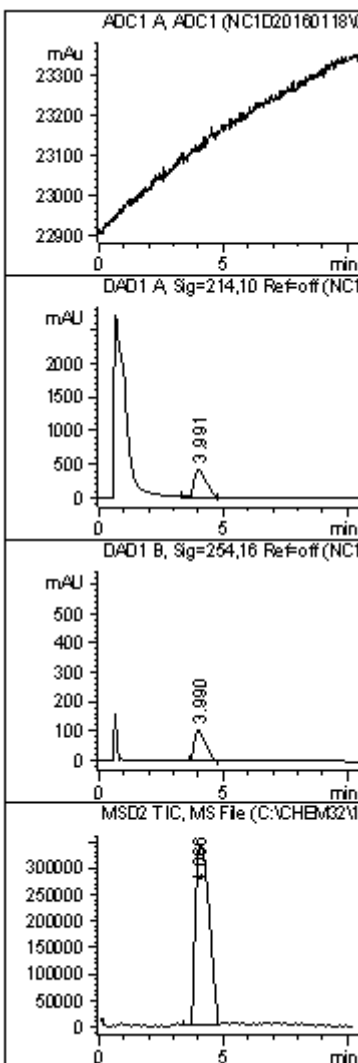

Signal 1: ADC1 A, ADC1

Signal 2: DAD1 A, Sig=214,10 Ref=off

| Peak # | RetTime [min] | Type | Width [min] | Area [mAU*s] | Height [mAU] | Area %   |
|--------|---------------|------|-------------|--------------|--------------|----------|
| 1      | 3.991         | WV   | 0.4863      | 1.49376e4    | 439.70038    | 100.0000 |

Totals : 1.49376e4 439.70038

Signal 3: DAD1 B, Sig=254,16 Ref=off

| Peak # | RetTime [min] | Type | Width [min] | Area [mAU*s] | Height [mAU] | Area %   |
|--------|---------------|------|-------------|--------------|--------------|----------|
| 1      | 3.990         | BV   | 0.4900      | 3252.58398   | 105.40896    | 100.0000 |

Totals : 3252.58398 105.40896

Signal 4: MSD2 TIC, MS File

| Peak # | RetTime [min] | Type | Width [min] | Area      | Height    | Area %   |
|--------|---------------|------|-------------|-----------|-----------|----------|
| 1      | 4.066         | WV   | 0.5335      | 1.30286e7 | 3.41681e5 | 100.0000 |

Totals : 1.30286e7 3.41681e5

\*\*\* End of Report \*\*\*

| Retention Time (MS) | MS Area  | Mol. Weight or Ion |
|---------------------|----------|--------------------|
| 4.066               | 13028626 | 303.10 I           |

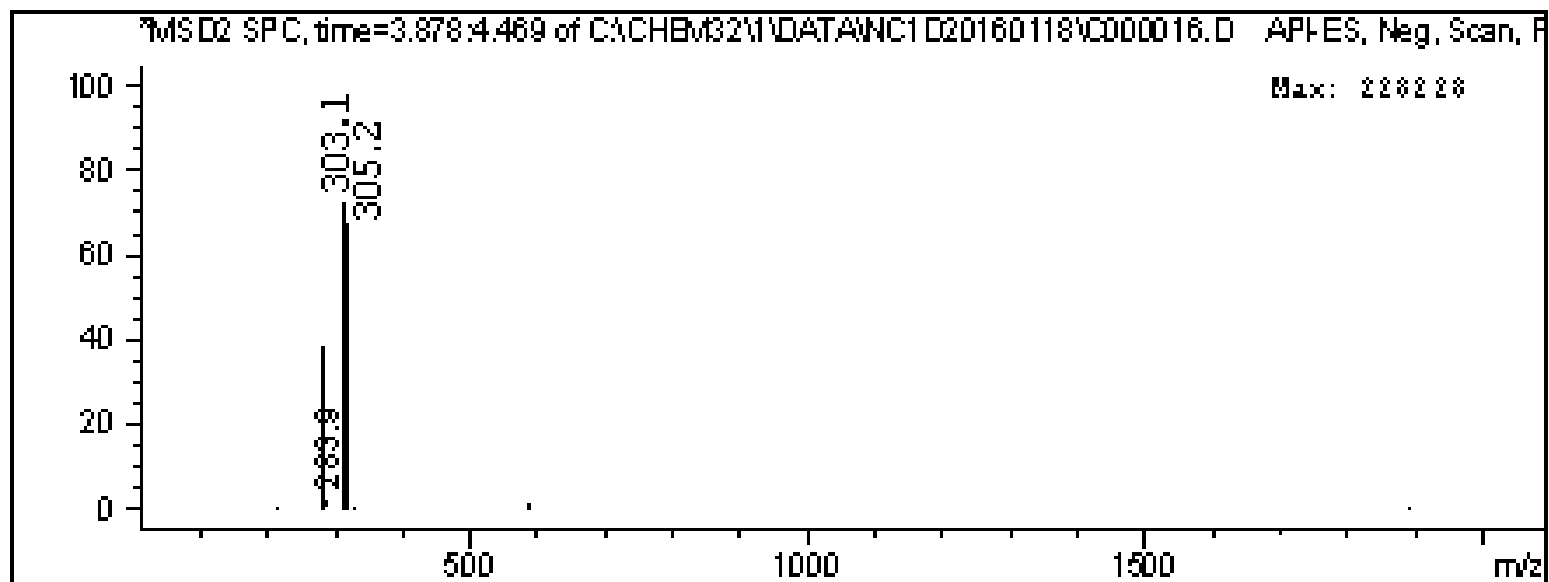

## LCMS of Compound 15

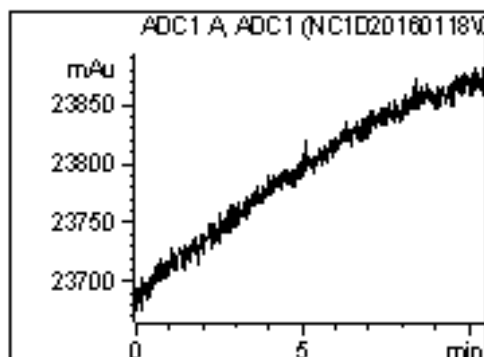

Signal 1: ADC1 A, ADC1

Signal 2: DAD1 A, Sig=214,10 Ref=off

| Peak # | RetTime [min] | Type | Width [min] | Area [mAU*s] | Height [mAU] | Area %   |
|--------|---------------|------|-------------|--------------|--------------|----------|
| 1      | 5.624         | UV   | 0.0866      | 1.60866e4    | 2996.74463   | 100.0000 |

Totals :                                   1.60866e4  2996.74463

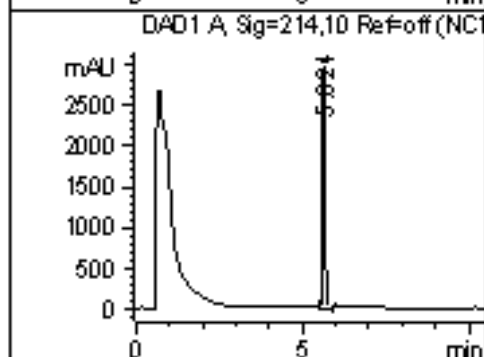

Signal 3: DAD1 B, Sig=254,16 Ref=off

| Peak # | RetTime [min] | Type | Width [min] | Area [mAU*s] | Height [mAU] | Area %   |
|--------|---------------|------|-------------|--------------|--------------|----------|
| 1      | 5.625         | BV   | 0.0704      | 7792.25195   | 1733.70581   | 100.0000 |

Totals :                                   7792.25195  1733.70581

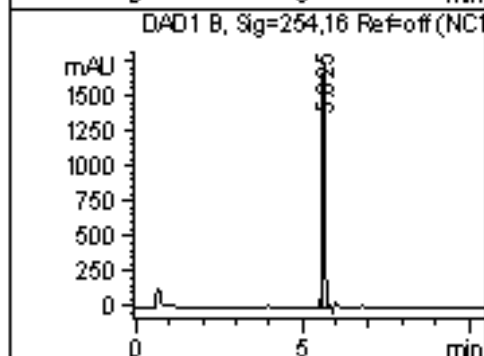

Signal 4: MSD2 TIC, MS File

| Peak # | RetTime [min] | Type | Width [min] | Area      | Height    | Area %   |
|--------|---------------|------|-------------|-----------|-----------|----------|
| 1      | 5.691         | BV   | 0.1693      | 8.15201e5 | 6.98976e4 | 100.0000 |

Totals :                                   8.15201e5  6.98976e4

=====

\*\*\* End of Report \*\*\*



| Retention Time (MS) | MS Area | Mol. Weight or Ion |
|---------------------|---------|--------------------|
| 5.691               | 815201  | 283.0              |

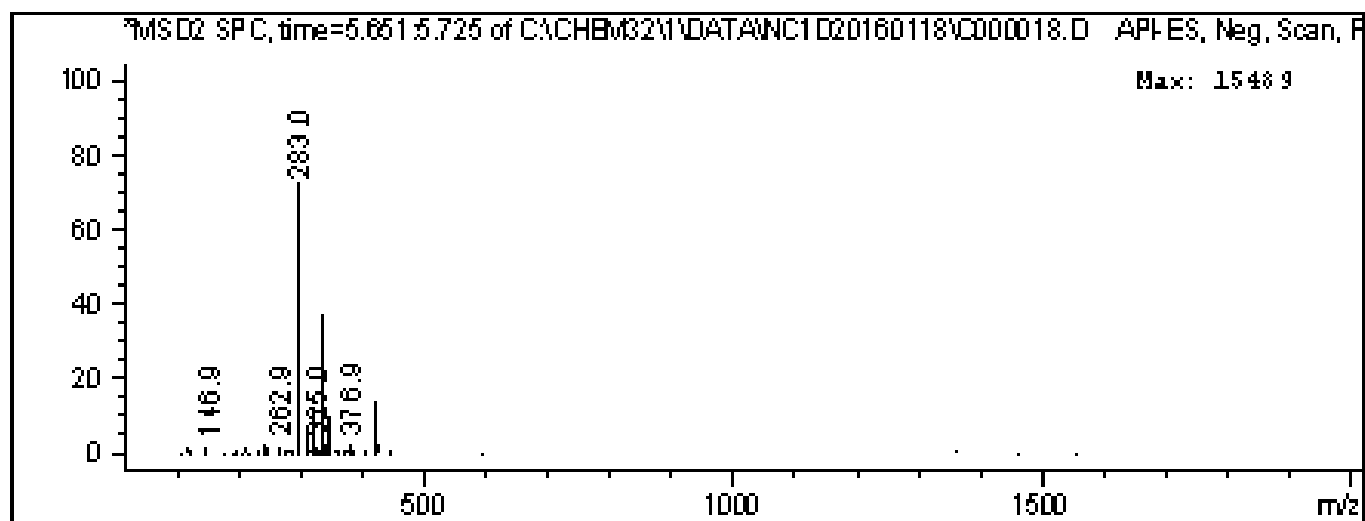

\*\*\* End of Report \*\*\*

# LCMS of Compound 21

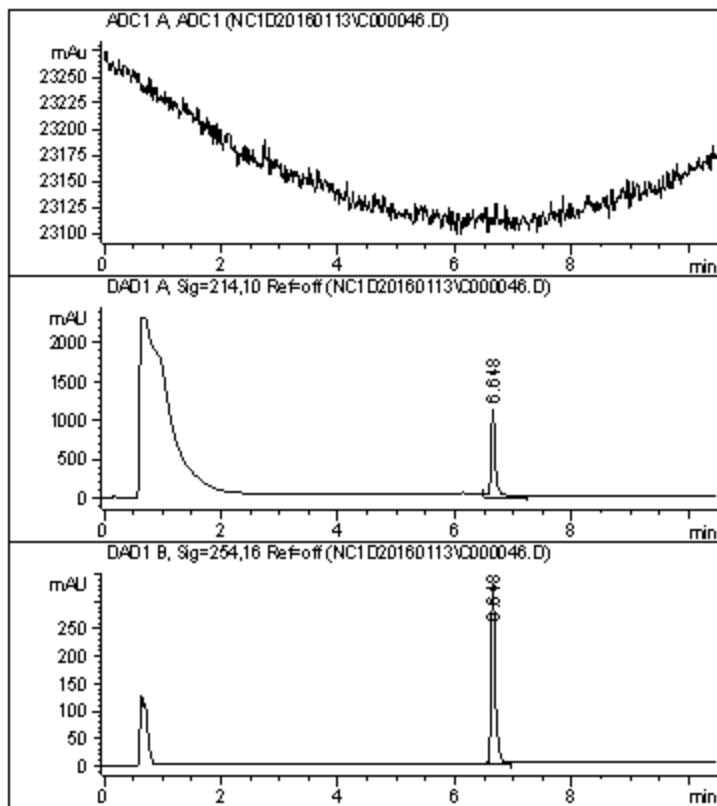

## Area Percent Report

Sorted By : Signal  
Multiplier : 1.0000  
Dilution : 1.0000  
Use Multiplier & Dilution Factor with ISTDs

Signal 1: ADC1 A, ADC1

Signal 2: DAD1 A, Sig=214,10 Ref=off

| Peak # | RetTime [min] | Type | Width [min] | Area [mAU*s] | Height [mAU] | Area %   |
|--------|---------------|------|-------------|--------------|--------------|----------|
| 1      | 6.648         | VV   | 0.0840      | 6593.68359   | 1130.68005   | 100.0000 |

Totals : 6593.68359 1130.68005

Signal 3: DAD1 B, Sig=254,16 Ref=off

| Peak # | RetTime [min] | Type | Width [min] | Area [mAU*s] | Height [mAU] | Area %   |
|--------|---------------|------|-------------|--------------|--------------|----------|
| 1      | 6.648         | VB   | 0.0729      | 1618.78113   | 332.18597    | 100.0000 |

Totals : 1618.78113 332.18597

Signal 4: MSD2 TIC, MS File

| Peak # | RetTime [min] | Type | Width [min] | Area      | Height    | Area %   |
|--------|---------------|------|-------------|-----------|-----------|----------|
| 1      | 6.739         | VV   | 0.4942      | 1.46084e7 | 3.98464e5 | 100.0000 |

Totals : 1.46084e7 3.98464e5

\*\*\* End of Report \*\*\*

| Retention Time (MS) | MS Area  | Mol. Weight or Ion |
|---------------------|----------|--------------------|
| 6.739               | 14608362 | 386.7 I            |

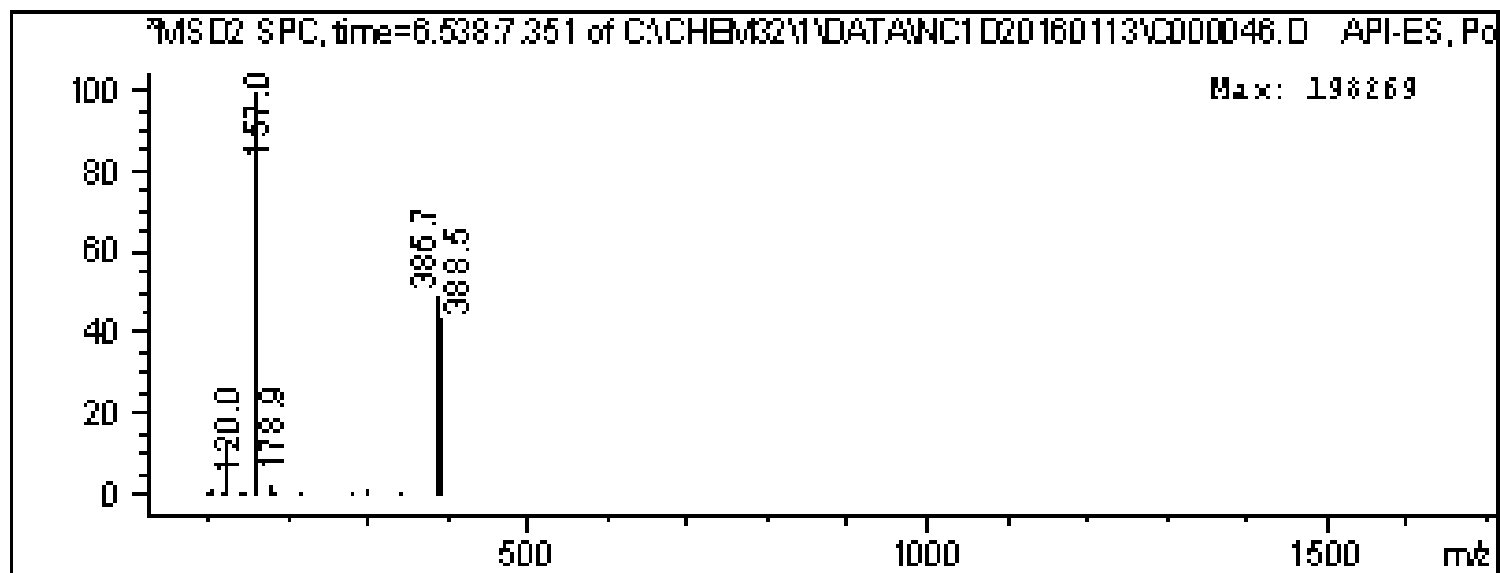

\*\*\* End of Report \*\*\*

# LCMS of Compound 24

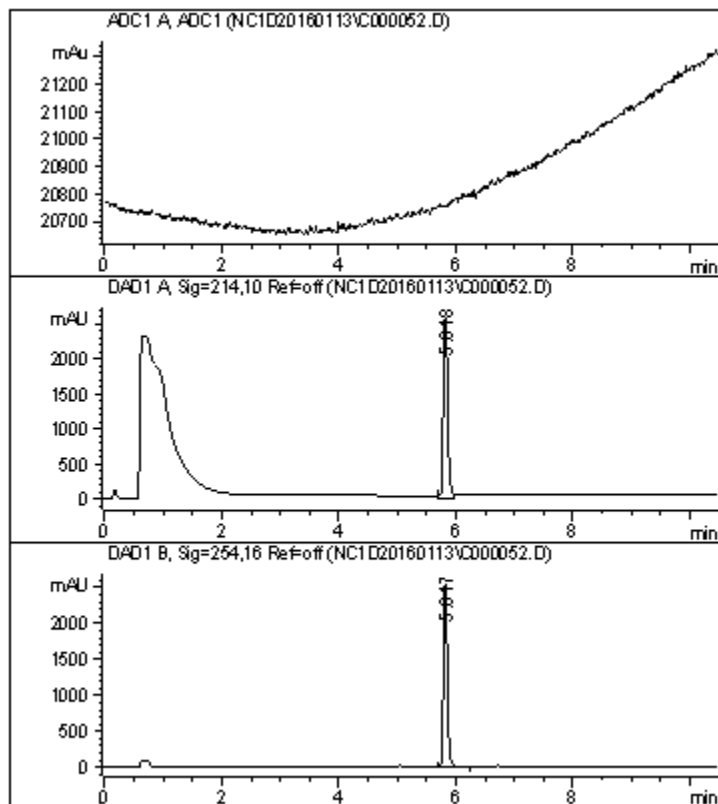

## Area Percent Report

```
Sorted By      :      Signal
Multiplier     :      1.0000
Dilution       :      1.0000
Use Multiplier & Dilution Factor with ISTDs
```

Signal 1: ADC1 A, ADC1

Signal 2: DAD1 A, Sig=214,10 Ref=off

| Peak # | RetTime [min] | Type | Width [min] | Area [mAU*s] | Height [mAU] | Area %   |
|--------|---------------|------|-------------|--------------|--------------|----------|
| 1      | 5.818         | VV   | 0.0861      | 1.38652e4    | 2604.76611   | 100.0000 |

Totals :                    1.38652e4  2604.76611

Signal 3: DAD1 B, Sig=254,16 Ref=off

| Peak # | RetTime [min] | Type | Width [min] | Area [mAU*s] | Height [mAU] | Area %   |
|--------|---------------|------|-------------|--------------|--------------|----------|
| 1      | 5.817         | BV   | 0.0738      | 1.18322e4    | 2568.20996   | 100.0000 |

Totals :                    1.18322e4  2568.20996

Signal 4: MSD2 TIC, MS File

| Peak # | RetTime [min] | Type | Width [min] | Area      | Height    | Area %   |
|--------|---------------|------|-------------|-----------|-----------|----------|
| 1      | 5.888         | VV   | 0.2254      | 2.23091e7 | 1.43776e6 | 100.0000 |

Totals :                    2.23091e7  1.43776e6

\*\*\* End of Report \*\*\*

| Retention Time (MS) | MS Area  | Mol. Weight or Ion |
|---------------------|----------|--------------------|
| 5.888               | 22309054 | 321.90 I           |

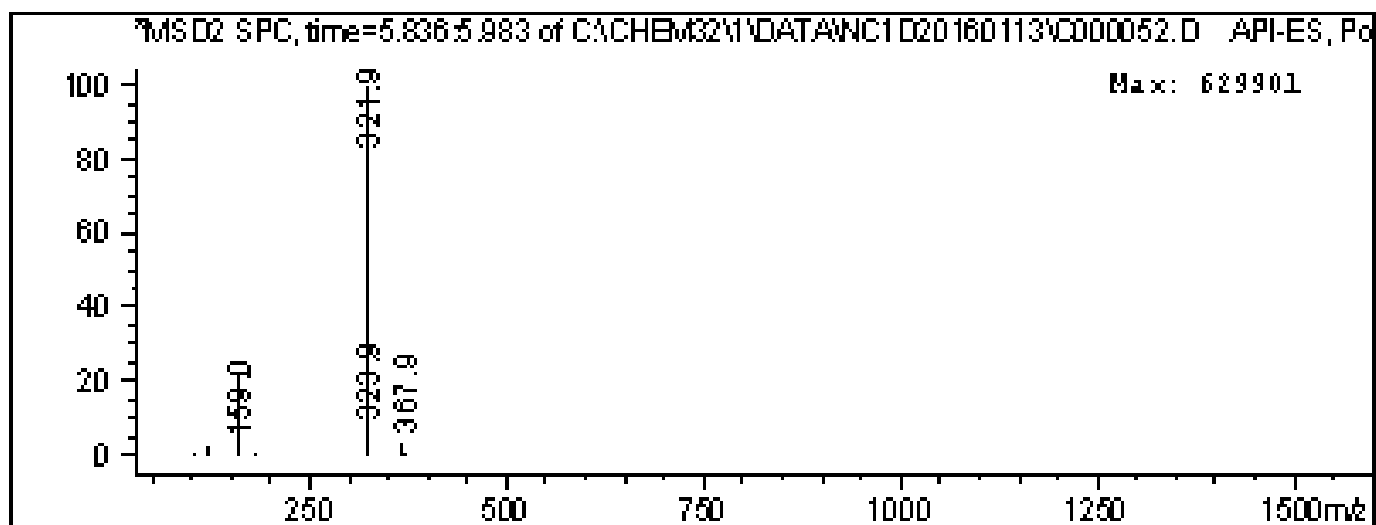

\*\*\* End of Report \*\*\*

# LCMS of Compound 30

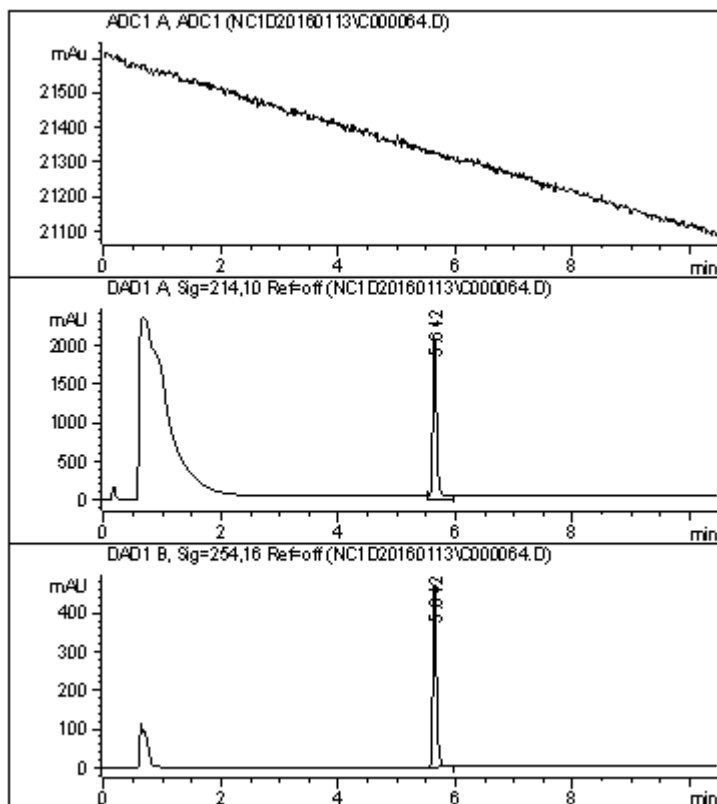

=====  
 Area Percent Report  
 =====

Sorted By : Signal  
 Multiplier : 1.0000  
 Dilution : 1.0000  
 Use Multiplier & Dilution Factor with ISTDs

Signal 1: ADC1 A, ADC1

Signal 2: DAD1 A, Sig=214,10 Ref=off

| Peak #   | RetTime [min] | Type | Width [min] | Area [mAU*s] | Height [mAU] | Area %   |
|----------|---------------|------|-------------|--------------|--------------|----------|
| 1        | 5.642         | VV   | 0.0746      | 1.01365e4    | 2087.83521   | 100.0000 |
| Totals : |               |      |             | 1.01365e4    | 2087.83521   |          |

Signal 3: DAD1 B, Sig=254,16 Ref=off

| Peak #   | RetTime [min] | Type | Width [min] | Area [mAU*s] | Height [mAU] | Area %   |
|----------|---------------|------|-------------|--------------|--------------|----------|
| 1        | 5.642         | BV   | 0.0640      | 2025.57593   | 472.49197    | 100.0000 |
| Totals : |               |      |             | 2025.57593   | 472.49197    |          |

Signal 4: MSD2 TIC, MS File

| Peak #   | RetTime [min] | Type | Width [min] | Area      | Height    | Area %   |
|----------|---------------|------|-------------|-----------|-----------|----------|
| 1        | 5.719         | VV   | 0.2478      | 1.33714e7 | 7.66846e5 | 100.0000 |
| Totals : |               |      |             | 1.33714e7 | 7.66846e5 |          |

=====  
 \*\*\* End of Report \*\*\*

| Retention Time (MS) | MS Area  | Mol. Weight or Ion |
|---------------------|----------|--------------------|
| 5.719               | 13371382 | 305.9 I            |

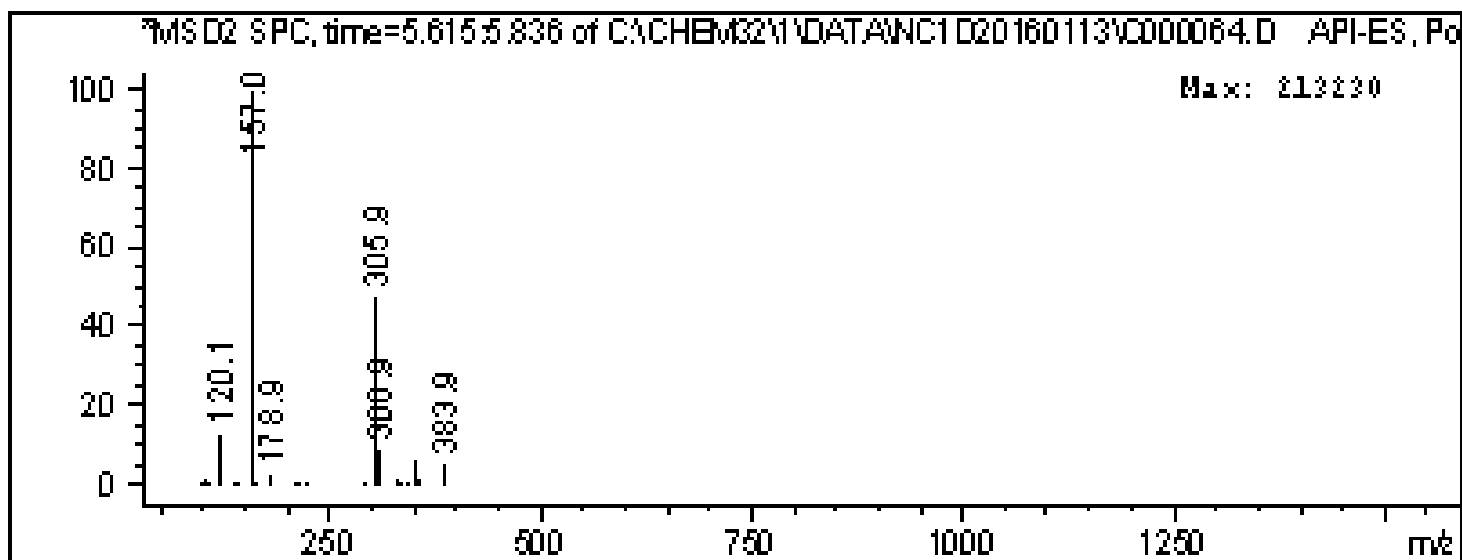

\*\*\* End of Report \*\*\*

**Table 1S.** Per residue binding free energy during 100 ns time

| <b>Amino Acid</b> | <b>Per residue binding free energy</b> | <b>Amino Acid</b> | <b>Per residue binding free energy</b> | <b>Amino Acid</b> | <b>Per residue binding free energy</b> | <b>Amino Acid</b> | <b>Per residue binding free energy</b> |
|-------------------|----------------------------------------|-------------------|----------------------------------------|-------------------|----------------------------------------|-------------------|----------------------------------------|
| THR_2             | 32.42                                  | GLU_69            | -54.48                                 | PRO_136           | 0.89                                   | VAL_203           | -15.26                                 |
| GLY_3             | -24.61                                 | HIS_70            | -36.36                                 | ILE_137           | -9.23                                  | GLY_204           | -29.95                                 |
| LEU_4             | -15.51                                 | LEU_71            | -17.77                                 | MET_138           | -29.05                                 | GLY_205           | -25.34                                 |
| LEU_5             | -24.55                                 | ALA_72            | -22.16                                 | ASN_139           | -37.17                                 | ALA_206           | -22.5                                  |
| ASP_6             | -56.06                                 | SER_73            | -21.55                                 | PRO_140           | 1.66                                   | LEU_207           | -23.88                                 |
| GLY_7             | -31.38                                 | LEU_74            | -23.85                                 | GLY_141           | -25.07                                 | GLY_208           | -27.6                                  |
| LYS_8             | -36.48                                 | ALA_75            | -36.85                                 | GLY_142           | -33.82                                 | GLU_209           | -49.84                                 |
| ARG_9             | -58.98                                 | GLY_76            | -30.26                                 | SER_143           | -22.39                                 | GLU_210           | -53.81                                 |
| ILE_10            | -19.35                                 | ARG_77            | -55.86                                 | ILE_144           | -16.31                                 | ALA_211           | -31.2                                  |
| LEU_11            | -23.05                                 | VAL_78            | -24.75                                 | VAL_145           | -21.39                                 | GLY_212           | -29.6                                  |
| VAL_12            | -23.95                                 | THR_79            | -11.46                                 | GLY_146           | -30.91                                 | ALA_213           | -25.31                                 |
| SER_13            | -25.25                                 | GLU_80            | -43.14                                 | MET_147           | -17.96                                 | GLN_214           | -60.17                                 |
| GLY_14            | -23.5                                  | ALA_81            | -27.11                                 | ASP_148           | -52.46                                 | ILE_215           | -15.85                                 |
| ILE_15            | -13.14                                 | ILE_82            | -13.74                                 | PHE_149           | -9.63                                  | GLN_216           | -56.38                                 |
| ILE_16            | -14.08                                 | GLY_83            | -21.46                                 | ASP_150           | -49.04                                 | LEU_217           | -16.6                                  |
| THR_17            | -5.77                                  | ALA_84            | -20.88                                 | PRO_151           | -4.36                                  | LEU_218           | -24.31                                 |
| ASP_18            | -62.39                                 | GLY_85            | -25.94                                 | SER_152           | -14.53                                 | GLU_219           | -50.7                                  |
| SER_19            | -21.52                                 | ASN_86            | -56.03                                 | ARG_153           | -41.38                                 | GLU_220           | -48.09                                 |
| SER_20            | -23.23                                 | LYS_87            | -29.01                                 | ALA_154           | -21.32                                 | GLY_221           | -27.01                                 |
| ILE_21            | -7.78                                  | LEU_88            | -25.6                                  | MET_155           | -15.65                                 | TRP_222           | -35.48                                 |
| ALA_22            | -29.55                                 | ASP_89            | -68.67                                 | PRO_156           | 6.94                                   | ASP_223           | -60.31                                 |
| PHE_23            | -20.83                                 | GLY_90            | -32.49                                 | ALA_157           | -24.74                                 | GLN_224           | -56.97                                 |
| HIS_24            | -34.56                                 | VAL_91            | -22.92                                 | TYR_158           | -33.6                                  | ARG_225           | -54.53                                 |
| ILE_25            | -21.73                                 | VAL_92            | -22.71                                 | ASN_159           | -57.4                                  | ALA_226           | -18.55                                 |
| ALA_26            | -32.04                                 | HIS_93            | -41.79                                 | TRP_160           | -28.71                                 | PRO_227           | 3.15                                   |



| <b>Amino Acid</b> | <b>Per residue binding free energy</b> | <b>Amino Acid</b> | <b>Per residue binding free energy</b> | <b>Amino Acid</b> | <b>Per residue binding free energy</b> | <b>Amino Acid</b> | <b>Per residue binding free energy</b> |
|-------------------|----------------------------------------|-------------------|----------------------------------------|-------------------|----------------------------------------|-------------------|----------------------------------------|
| ARG_27            | -49.74                                 | SER_94            | -19.3                                  | MET_161           | -28.92                                 | ILE_228           | -9.7                                   |
| VAL_28            | -18.68                                 | ILE_95            | -18.49                                 | THR_162           | -13.95                                 | GLY_229           | -24.94                                 |
| ALA_29            | -32.8                                  | GLY_96            | -23.53                                 | VAL_163           | -11.57                                 | TRP_230           | -23.54                                 |
| GLN_30            | -65.89                                 | PHE_97            | 2.23                                   | ALA_164           | -26                                    | ASN_231           | -45.21                                 |
| GLU_31            | -46.25                                 | MET_98            | -10.9                                  | LYS_165           | -31.04                                 | MET_232           | -23.98                                 |
| GLN_32            | -65.74                                 | PRO_99            | -0.4                                   | SER_166           | -26.33                                 | LYS_233           | -19.05                                 |
| GLY_33            | -31.43                                 | GLN_100           | -58.88                                 | ALA_167           | -25.53                                 | ASP_234           | -61.61                                 |
| ALA_34            | -28.43                                 | THR_101           | -14.4                                  | LEU_168           | -26.2                                  | ALA_235           | -32.97                                 |
| GLN_35            | -54.46                                 | GLY_102           | -21.25                                 | GLU_169           | -58.98                                 | THR_236           | -2.03                                  |
| LEU_36            | -18.9                                  | MET_103           | -29.62                                 | SER_170           | -20.55                                 | PRO_237           | -2.47                                  |
| VAL_37            | -22.91                                 | GLY_104           | -31.87                                 | VAL_171           | -23.66                                 | VAL_238           | -19.25                                 |
| LEU_38            | -24.26                                 | ILE_105           | -1.98                                  | ASN_172           | -63.65                                 | ALA_239           | -31.06                                 |
| THR_39            | -19.48                                 | ASN_106           | -42.76                                 | ARG_173           | -53.87                                 | LYS_240           | -31.34                                 |
| GLY_40            | -22.26                                 | PRO_107           | 3.18                                   | PHE_174           | -10.44                                 | THR_241           | -19.75                                 |
| PHE_41            | -6.29                                  | PHE_108           | -9.3                                   | VAL_175           | -22.82                                 | VAL_242           | -17.77                                 |
| ASP_42            | -56.43                                 | PHE_109           | -11.27                                 | ALA_176           | -27.74                                 | CYS_243           | -23.86                                 |
| ARG_43            | -47.71                                 | ASP_110           | -58.25                                 | ARG_177           | -47.49                                 | ALA_244           | -31.54                                 |
| LEU_44            | -20.87                                 | ALA_111           | -10.68                                 | GLU_178           | -54                                    | LEU_245           | -27.63                                 |
| ARG_45            | -44.2                                  | PRO_112           | 7.16                                   | ALA_179           | -33.02                                 | LEU_246           | -24.97                                 |
| LEU_46            | -16.01                                 | TYR_113           | -21.38                                 | GLY_180           | -26.38                                 | SER_247           | -24.21                                 |
| ILE_47            | -19.01                                 | ALA_114           | -25.21                                 | LYS_181           | -30.61                                 | ASP_248           | -55.06                                 |
| GLN_48            | -54.64                                 | ASP_115           | -65.72                                 | TYR_182           | -22.44                                 | TRP_249           | -20.92                                 |
| ARG_49            | -42.9                                  | VAL_116           | -23.14                                 | GLY_183           | -28.04                                 | LEU_250           | -0.3                                   |
| ILE_50            | -16.05                                 | SER_117           | -18.11                                 | VAL_184           | -25.72                                 | PRO_251           | 8.27                                   |
| THR_51            | -15.39                                 | LYS_118           | -29.63                                 | ARG_185           | -50.55                                 | ALA_252           | -24.79                                 |
| ASP_52            | -53.6                                  | GLY_119           | -35.11                                 | SER_186           | -24.67                                 | THR_253           | -14.68                                 |
| ARG_53            | -52.06                                 | ILE_120           | -19.81                                 | ASN_187           | -66.8                                  | THR_254           | -10.99                                 |

| <b>Amino Acid</b> | <b>Per residue binding free energy</b> | <b>Amino Acid</b> | <b>Per residue binding free energy</b> | <b>Amino Acid</b> | <b>Per residue binding free energy</b> | <b>Amino Acid</b> | <b>Per residue binding free energy</b> |
|-------------------|----------------------------------------|-------------------|----------------------------------------|-------------------|----------------------------------------|-------------------|----------------------------------------|
| LEU_54            | -7.59                                  | HIS_121           | -34.8                                  | LEU_188           | -29.7                                  | GLY_255           | -24.79                                 |
| PRO_55            | 1.67                                   | ILE_122           | -19.14                                 | VAL_189           | -26.77                                 | ASP_256           | -60.83                                 |
| ALA_56            | -20.72                                 | SER_123           | -24.48                                 | ALA_190           | -27.85                                 | ILE_257           | -13.9                                  |
| LYS_57            | -21.15                                 | ALA_124           | -29.79                                 | ALA_191           | -30.8                                  | ILE_258           | -15.58                                 |
| ALA_58            | -9.67                                  | TYR_125           | -26.05                                 | GLY_192           | -20.57                                 | TYR_259           | -20.35                                 |
| PRO_59            | 3.79                                   | SER_126           | -30.85                                 | PRO_193           | -7.02                                  | ALA_260           | -16.73                                 |
| LEU_60            | -23.45                                 | TYR_127           | -33.1                                  | ILE_194           | -15.71                                 | ASP_261           | -70.85                                 |
| LEU_61            | -17.42                                 | ALA_128           | -28.24                                 | ARG_195           | -48.13                                 | GLY_262           | -35.01                                 |
| GLU_62            | -47.96                                 | SER_129           | -26.08                                 | THR_196           | -8.89                                  | GLY_263           | -29.24                                 |
| LEU_63            | -16.01                                 | MET_130           | -26.02                                 | LEU_197           | -6.69                                  | ALA_264           | -32.87                                 |
| ASP_64            | -57.74                                 | ALA_131           | -29.34                                 | ALA_198           | -25.96                                 | HIS_265           | -34.28                                 |
| VAL_65            | -20.17                                 | LYS_132           | -31.55                                 | MET_199           | -32.32                                 | THR_266           | -12.3                                  |
| GLN_66            | -55.15                                 | ALA_133           | -27.48                                 | SER_200           | -16.29                                 | GLN_267           | -56.33                                 |
| ASN_67            | -56.63                                 | LEU_134           | -23.88                                 | ALA_201           | -26.85                                 | LEU_268           | -6.36                                  |
| GLU_68            | -53.07                                 | LEU_135           | -12.3                                  | ILE_202           | -14.77                                 | LEU_269           | 8.92                                   |
